# Supplementary material for: Vulcanization kinetics and mechanical properties of filled ethylene-vinyl acetate copolymer rubber composites
Source: publisher site journal article supplement (doi:10.1515/ipp-2023-4365), 2023-05-25
Supplement: Supplementary file 1 [file j_ipp-2023-4365_suppl_001.docx]

**Supplementary Material**

Table S1. Parameters of DSC curves

| Sample | β/(℃*min-1) | Ti/(℃) | Tp/(℃) | Tf/(℃) | ΔH/(J*g-1) |
| --- | --- | --- | --- | --- | --- |
| KB | 5 | 112.64 | 149.92 | 185.76 | 26.08 |
| 10 | 117.84 | 158.50 | 195.03 | 45.36 |
| 15 | 120.78 | 164.75 | 203.21 | 58.24 |
| 20 | 124.86 | 169.00 | 210.10 | 91.93 |
| 25 | 127.43 | 174.17 | 213.49 | 99.34 |
| CB/EVM | 5 | 120.50 | 155.75 | 193.42 | 21.13 |
| 10 | 129.83 | 164.00 | 203.83 | 35.67 |
| 15 | 134.50 | 168.75 | 207.25 | 51.57 |
| 20 | 137.67 | 174.67 | 214.00 | 53.49 |
| 25 | 142.92 | 176.67 | 220.00 | 86.18 |
| SiO2/EVM | 5 | 109.69 | 148.00 | 197.19 | 20.33 |
| 10 | 123.20 | 157.17 | 206.59 | 32.75 |
| 15 | 125.63 | 162.25 | 212.44 | 45.57 |
| 20 | 127.32 | 166.67 | 216.82 | 78.70 |
| 25 | 131.04 | 171.25 | 226.85 | 93.02 |
| Mg(OH)2/EVM | 5 | 109.69 | 148.00 | 197.19 | 19.43 |
| 10 | 116.92 | 156.83 | 205.16 | 38.72 |
| 15 | 129.79 | 163.25 | 210.45 | 50.02 |
| 20 | 131.43 | 167.00 | 215.08 | 83.56 |
| 25 | 133.51 | 170.42 | 225.30 | 84.95 |
| Al(OH)3/EVM | 5 | 109.17 | 150.25 | 186.23 | 22.26 |
| 10 | 112.64 | 157.83 | 198.71 | 44.99 |
| 15 | 121.82 | 164.25 | 207.11 | 66.72 |
| 20 | 128.54 | 168.33 | 211.71 | 81.73 |
| 25 | 130.07 | 173.33 | 215.86 | 101.81 |


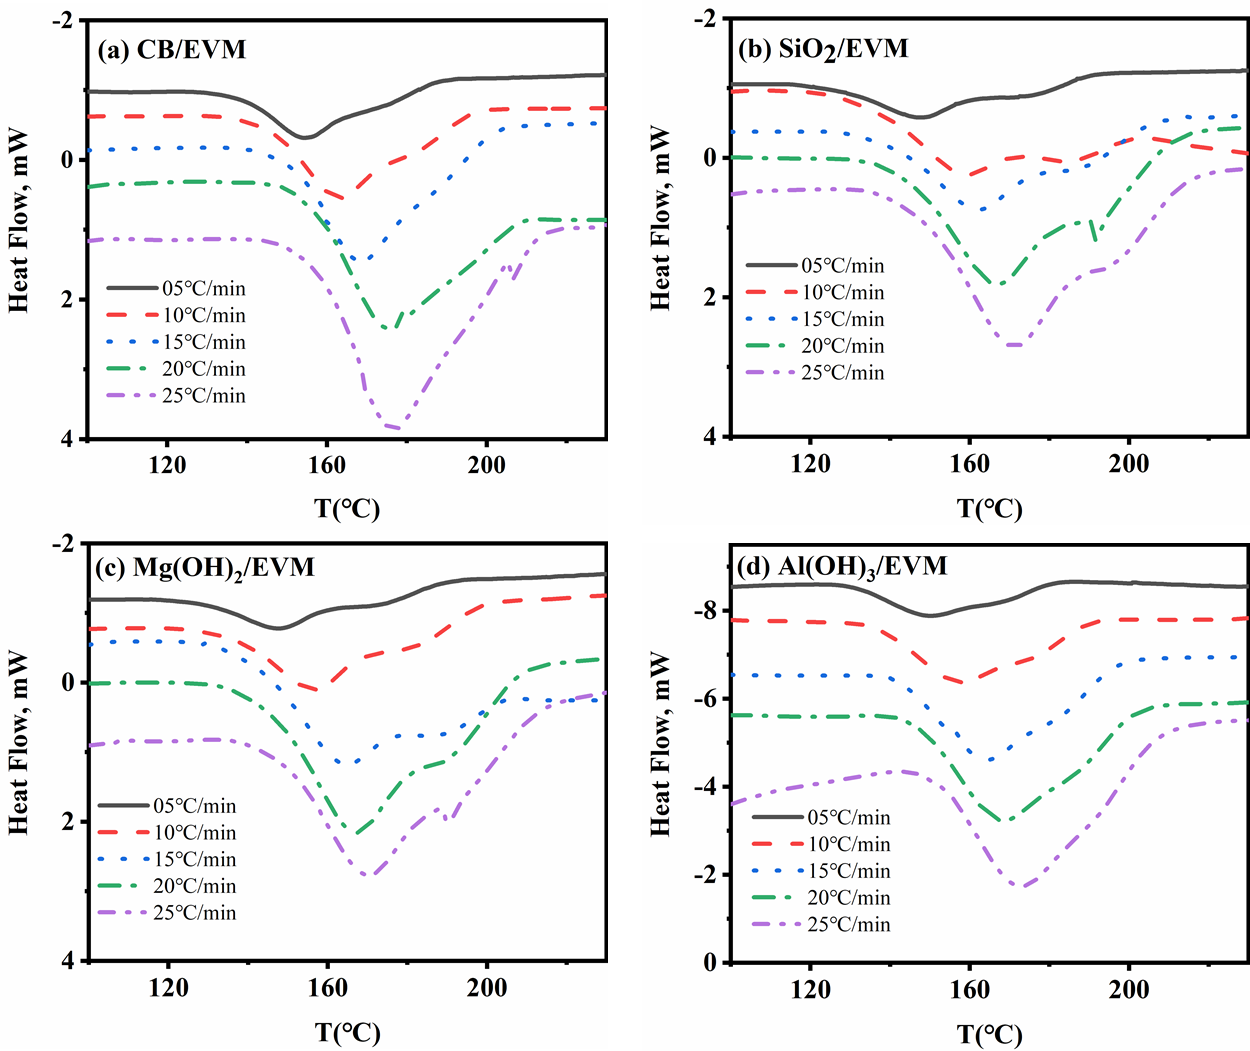


Figure S3. DSC curves of EVM composites with different β.


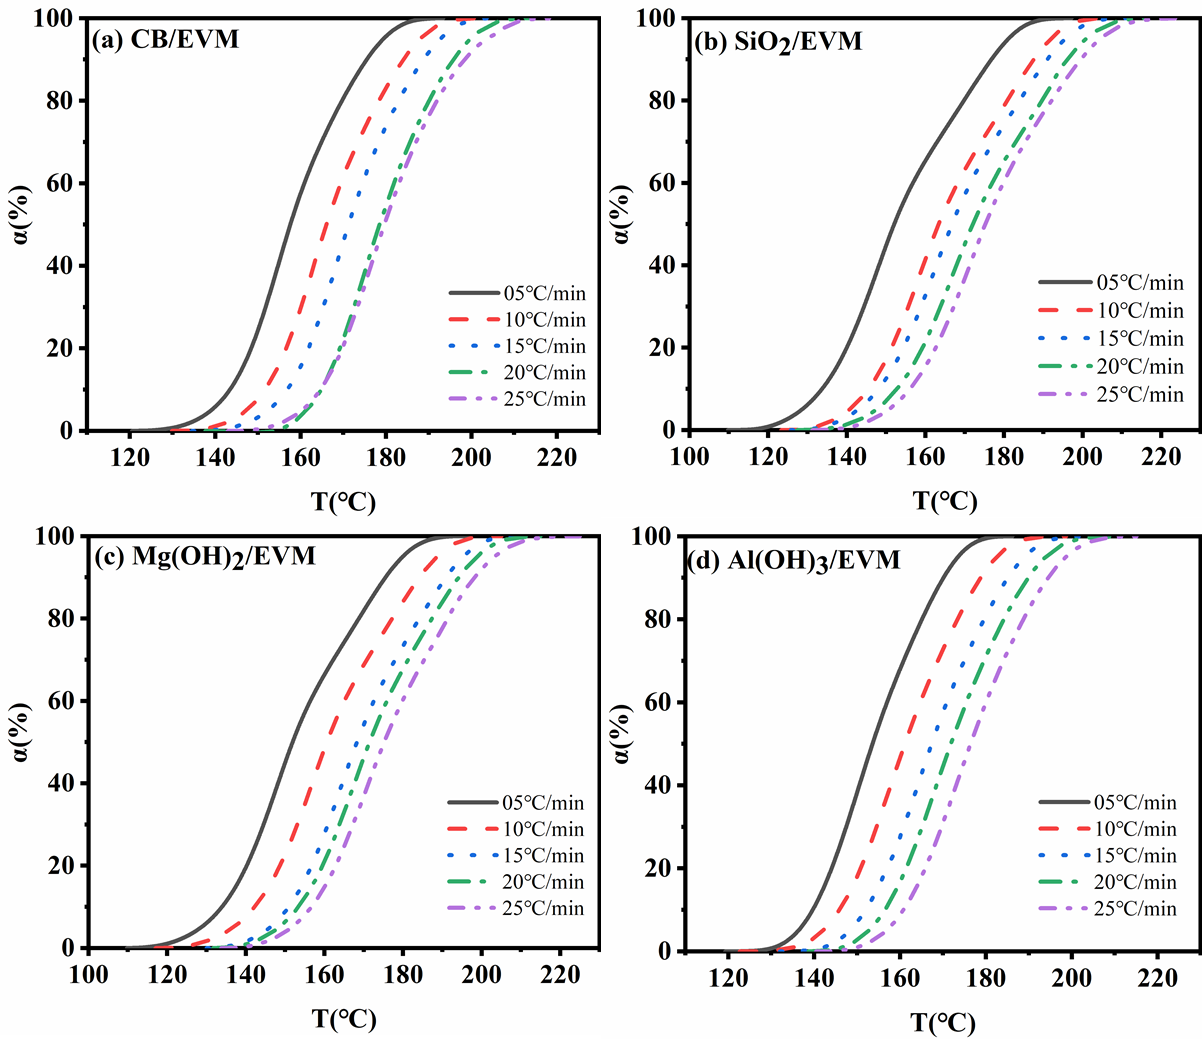


Figure S5. α-T curves of EVM composites with different β.
